# Supplementary material for: Both haemagglutinin-specific antibody and T cell responses induced by a chimpanzee adenoviral vaccine confer protection against influenza H7N9 viral challenge
Source: PubMed Central journal article supplement (PMC5431854; doi:10.1038/s41598-017-02019-1), 2017-05-12
Supplement: 41598_2017_2019_MOESM1_ESM.pdf [file 41598_2017_2019_MOESM1_ESM.pdf]

Supplementary information:

**Both haemagglutinin-specific antibody and T cell responses induced by a chimpanzee adenoviral vaccine confer protection against influenza H7N9 viral challenge**

**Authors:** Xiang Wang<sup>1,2,†</sup>, Weihui Fu<sup>3,†</sup>, Songhua Yuan<sup>3</sup>, Xi Yang<sup>2</sup>, Yufeng Song<sup>2</sup>, Lulu Liu<sup>1,2</sup>, Yudan Chi<sup>2</sup>, Tao Cheng<sup>2</sup>, Man Xing<sup>2</sup>, Yan Zhang<sup>2</sup>, Chao Zhang<sup>2</sup>, Yong Yang<sup>2</sup>, Caihong Zhu<sup>2</sup>, Xiaoyan Zhang<sup>3</sup>, Sidong Xiong<sup>1,\*</sup>, Jianqing Xu<sup>3,\*</sup>, and Dongming Zhou<sup>2,\*</sup>

**Affiliations:**

<sup>1</sup>Institute of Biology and Medical Sciences, Soochow University, Suzhou 215123, China

<sup>2</sup>Vaccine Research Center, Key Laboratory of Molecular Virology & Immunology, Institut Pasteur of Shanghai, Chinese Academy of Sciences, Shanghai 200031, China

<sup>3</sup>Shanghai Public Health Clinical Center and Institutes of Biomedical Sciences, Key Laboratory of Medical Molecular Virology of Ministry of Education/Health at Shanghai Medical College, Fudan University, Shanghai 200031, China

\*Correspondence and requests for materials should be addressed to: Dongming Zhou, dmzhou@sibs.ac.cn; Jianqing Xu, xujianqing2014@126.com; Sidong Xiong, sdxiong@suda.edu.cn

† Equal contributors

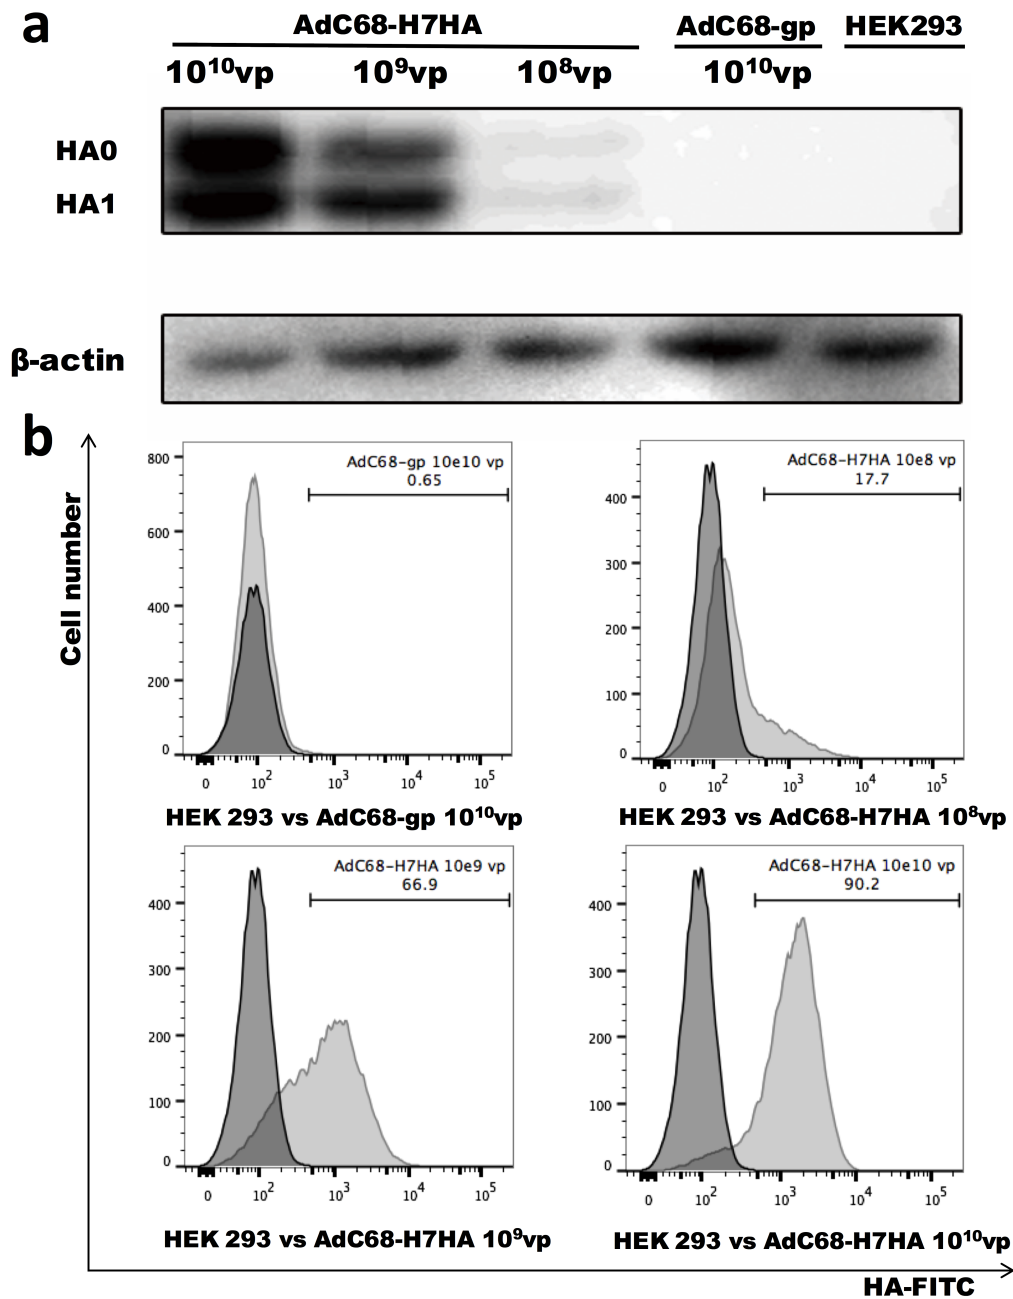

**Supplementary Figure 1. Expression of the target protein H7N9 HA in HEK293 cells.** (a) Different quantities of AdC68-H7HA (10<sup>10</sup>, 10<sup>9</sup>, or 10<sup>8</sup> vp) were used to infect HEK293 cells in a 6-well plate. AdC68-gp (10<sup>9</sup> vp) was used as a negative control, and uninfected HEK293 cells were used as blank control. Twenty-four hours later, cell lysates were analyzed by western blotting using an anti-H7 HA polyclonal antibody. (b) At 24 hours after infection with AdC68-H7HA or AdC68-gp, the HEK293 cells were resuspended, washed, incubated with mouse H7 HA-positive sera, and then stained with a FITC-conjugated anti-mouse antibody. The percentage of positive HEK293 cells in each group was determined by FACS analysis.
